# Supplementary material for: Transcriptome sequencing of three Ranunculus species (Ranunculaceae) reveals candidate genes in adaptation from terrestrial to aquatic habitats
Source: PubMed Central journal article supplement (PMC4438715; doi:10.1038/srep10098), 2015-05-20
Supplement: srep10098-s1.pdf [file srep10098-s1.pdf]

Supplementary Information

Transcriptome sequencing of three *Ranunculus* species (Ranunculaceae) reveals candidate genes in adaptation from terrestrial to aquatic habitats

Ling-Yun Chen<sup>1,†</sup>, Shu-Ying Zhao<sup>1,†</sup>, Qing-Feng Wang<sup>1\*</sup>, Michael L. Moody<sup>2</sup>

<sup>1</sup>Key Laboratory of Aquatic Botany and Watershed Ecology, Wuhan Botanical Garden, Chinese Academy of Sciences, Wuhan 430074, Hubei, PR China,

<sup>2</sup>Department of Biological Sciences, University of Texas at El Paso, 500 West University Ave, El Paso, TX, 79968, USA.

\* Author for correspondence: Qing-Feng Wang

Address: Wuhan Botanical Garden, Chinese Academy of Sciences, Wuhan 430074, Hubei, PR China.

E-mail: [qfwang@wbgcas.cn](mailto:qfwang@wbgcas.cn)

† These authors contributed equally to this work

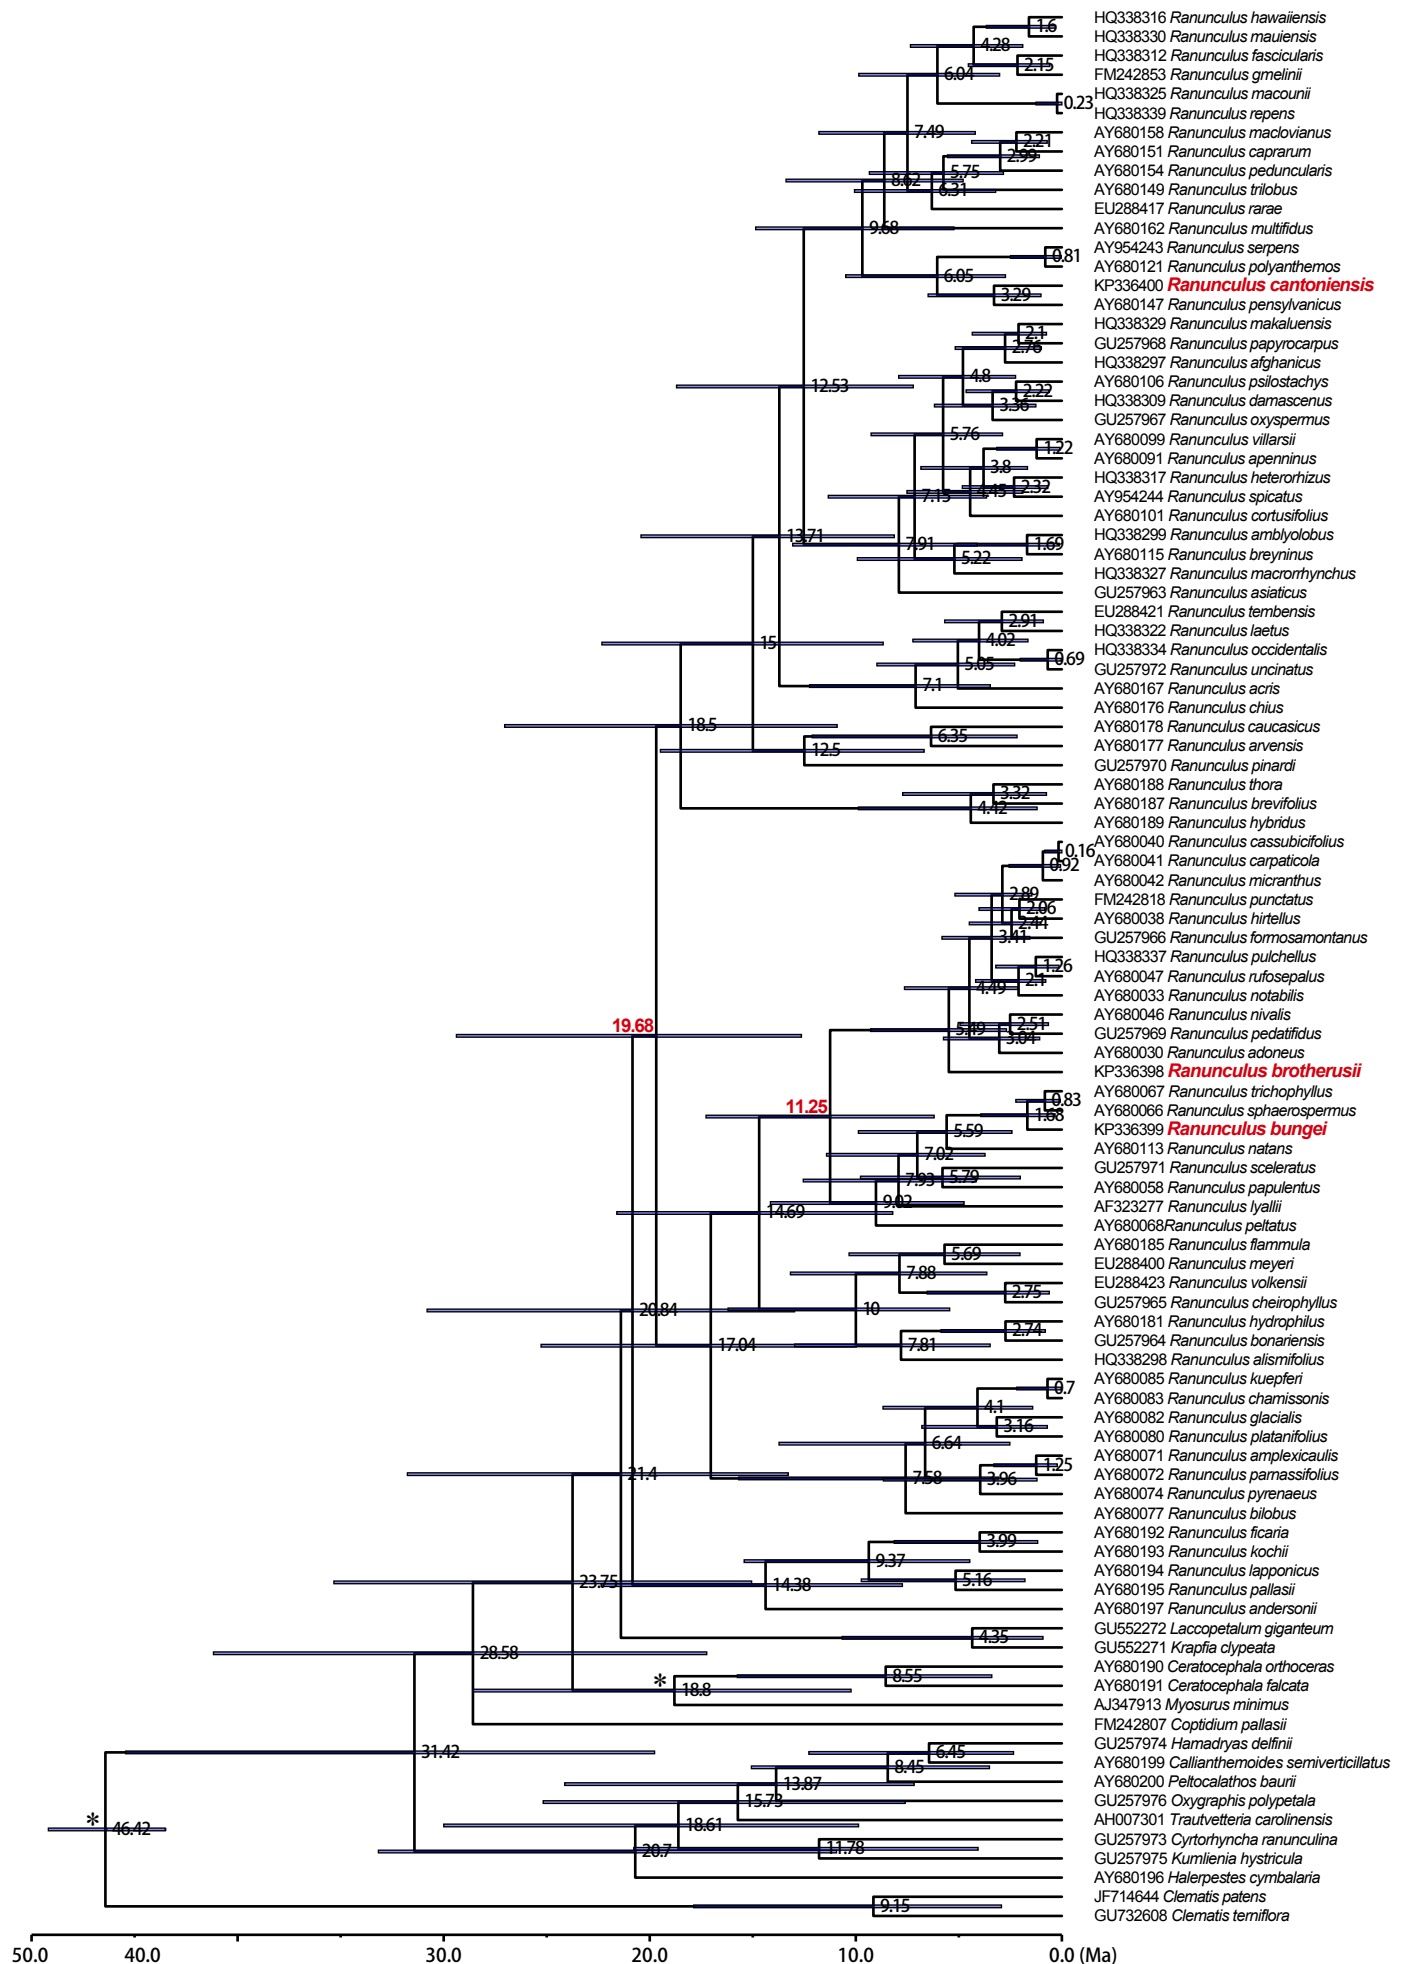

Fig. S1. Chronogram of *Ranunculus* using ITS. Blue bars indicate 95% highest posterior distributions, numbers along nodes indicate the mean ages, stars indicate the two fossil calibration points. The 3 species used for transcriptome analysis were highlighted in red colour and bold font. Genbank nos. were provided in front of species name.

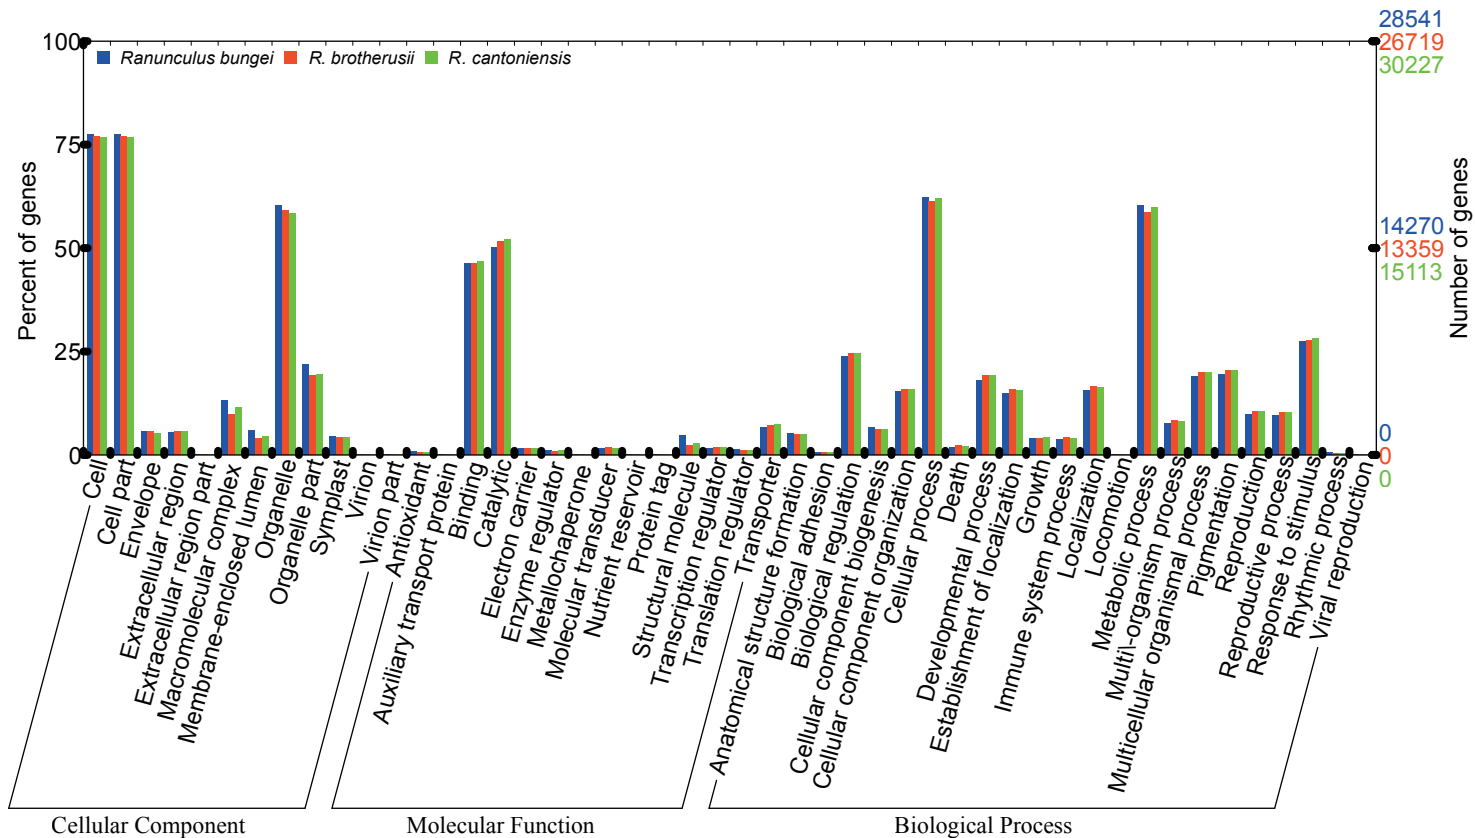

Fig. S2. GO categories of the unigenes of *Ranunculus bungei*, *R. brotherusii* and *R. cantoniensis* as plotted by WEGO.

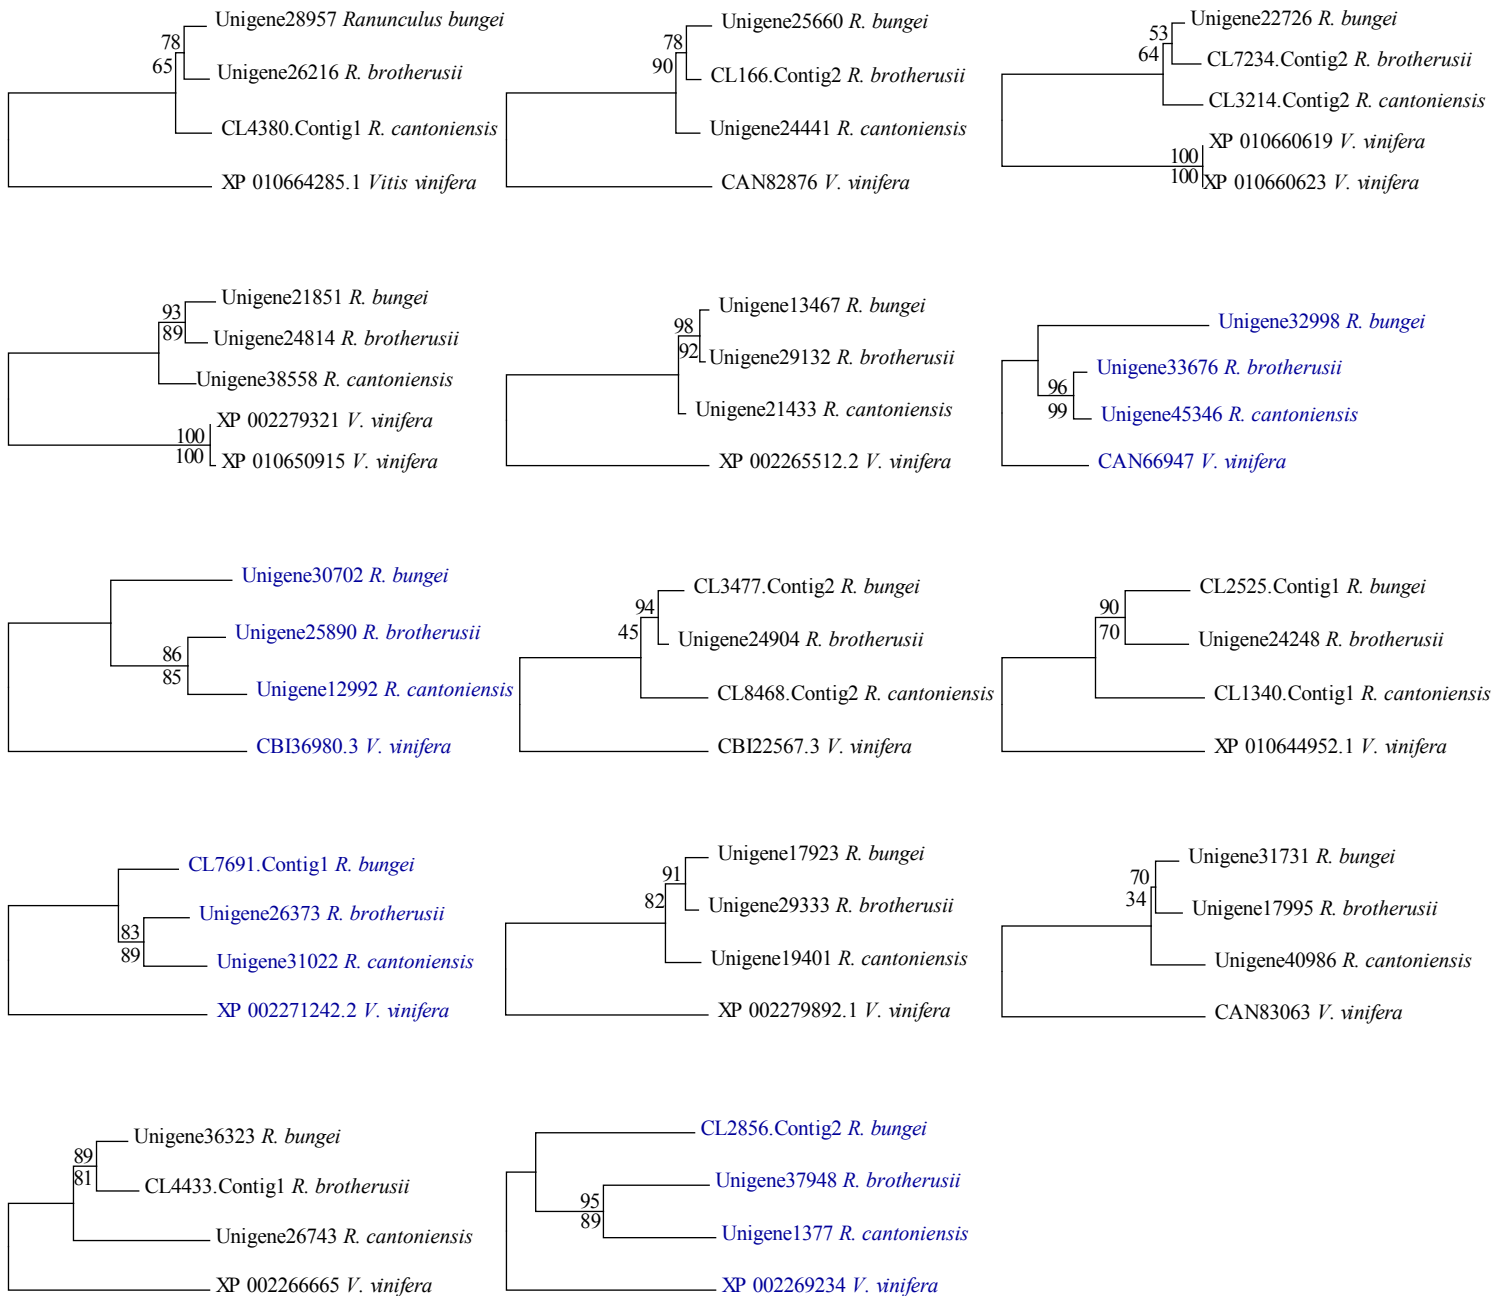

Fig. S3. Phylogenetic relationships of the PSGs in *R. bungei* and the orthologs in *R. brotherusii* and *R. cantoniensis*. Bootstrap values inferred from maximum likelihood and maximum parsimony are shown above and below the branches respectively. Orthologs with topologies inconsistent with that of ITS (Fig. 1) are in blue colour.

**Table S1.** *De novo* assembly from transcriptomes of *R. bungei*, *R. brotherusii* and *R. cantoniensis*, and annotations.

| Sequences                                                   | <i>R. bungei</i> | <i>R. brotherusii</i> | <i>R. cantoniensis</i> |
|-------------------------------------------------------------|------------------|-----------------------|------------------------|
| <b>Clean reads</b>                                          |                  |                       |                        |
| No. of reads                                                | 106,256,806      | 106,580,162           | 102,823,982            |
| No. of nucleotides (nt)                                     | 9,563,112,540    | 9,592,214,580         | 9,254,158,380          |
| Q20 percentage                                              | 98.92%           | 98.97%                | 98.40%                 |
| N percentage                                                | 0.01%            | 0.01%                 | 0.01%                  |
| GC percentage                                               | 45.22%           | 44.70%                | 44.08%                 |
| <b>Contigs</b>                                              |                  |                       |                        |
| No. of contigs                                              | 126,037          | 114,753               | 140,218                |
| Total length (nt)                                           | 45,026,691       | 39,928,897            | 47,992,342             |
| Mean length (nt)                                            | 357              | 348                   | 342                    |
| N50                                                         | 692              | 727                   | 649                    |
| <b>Unigenes</b>                                             |                  |                       |                        |
| No. of unigenes                                             | 76,362           | 62,210                | 80,957                 |
| Total length (nt)                                           | 48,616,604       | 42,780,409            | 55,387,611             |
| Mean length (nt)                                            | 637              | 688                   | 684                    |
| N50                                                         | 1132             | 1187                  | 1170                   |
| <b>Annotated unigenes<sup>a</sup> number and percentage</b> |                  |                       |                        |
| NR                                                          | 39,669 (52%)     | 36,419 (64%)          | 41,926 (49%)           |
| Swiss-prot                                                  | 25,448 (33%)     | 23,465 (41%)          | 27,663 (31%)           |
| KEGG                                                        | 23,305 (31%)     | 20,767 (37%)          | 24,531 (29%)           |
| COG                                                         | 14,894 (20%)     | 12,839 (24%)          | 15,098 (18%)           |
| GO                                                          | 28,541 (37%)     | 26,718 (46%)          | 30,226 (35%)           |
| NT                                                          | 25,575 (33%)     | 24,392 (41%)          | 27,542 (32%)           |
| Total                                                       | 41,111 (54%)     | 37,427 (66%)          | 43,565 (51%)           |
| <b>Unannotated unigenes number and percentage</b>           |                  |                       |                        |
| Total                                                       | 35,251 (46%)     | 24,783 (57%)          | 37392 (44%)            |

<sup>a</sup> E-value <10<sup>-5</sup>
